# Supplementary figures and images for: IgG Anti–Citrullinated Protein Antibody Variable Domain Glycosylation Increases Before the Onset of Rheumatoid Arthritis and Stabilizes Thereafter: A Cross‐Sectional Study Encompassing ~1,500 Samples
Source: PubMed Central journal article supplement — Arthritis Rheumatol. 2022 May 28;74(7):1147–58. doi: 10.1002/art.42098 (PMC9544857; doi:10.1002/art.42098), 2022-05-28

**A**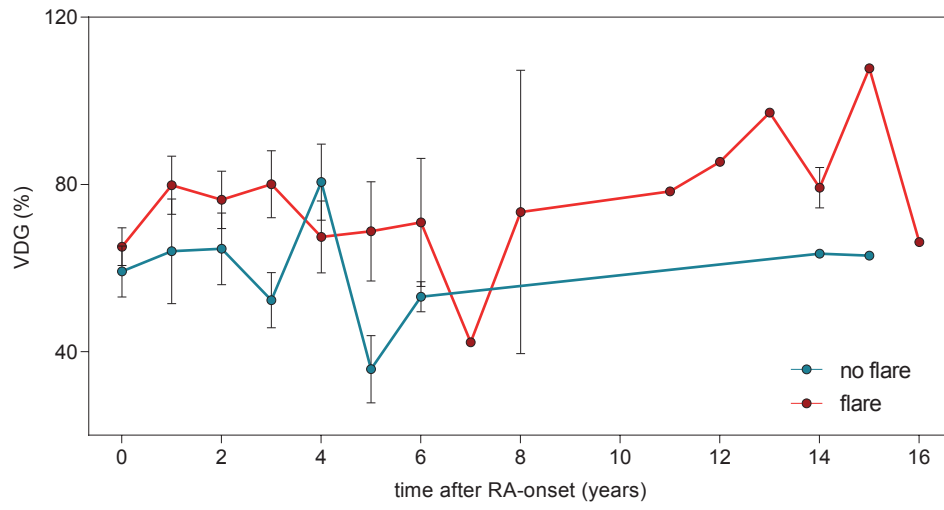**B**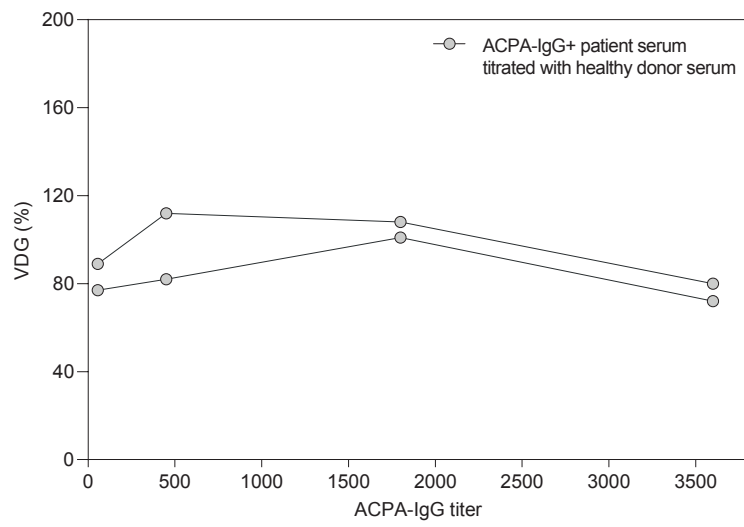

Supplement: ART-74-1147-s003.pdf [file ART-74-1147-s003.pdf]

**A**

established RA after treatment

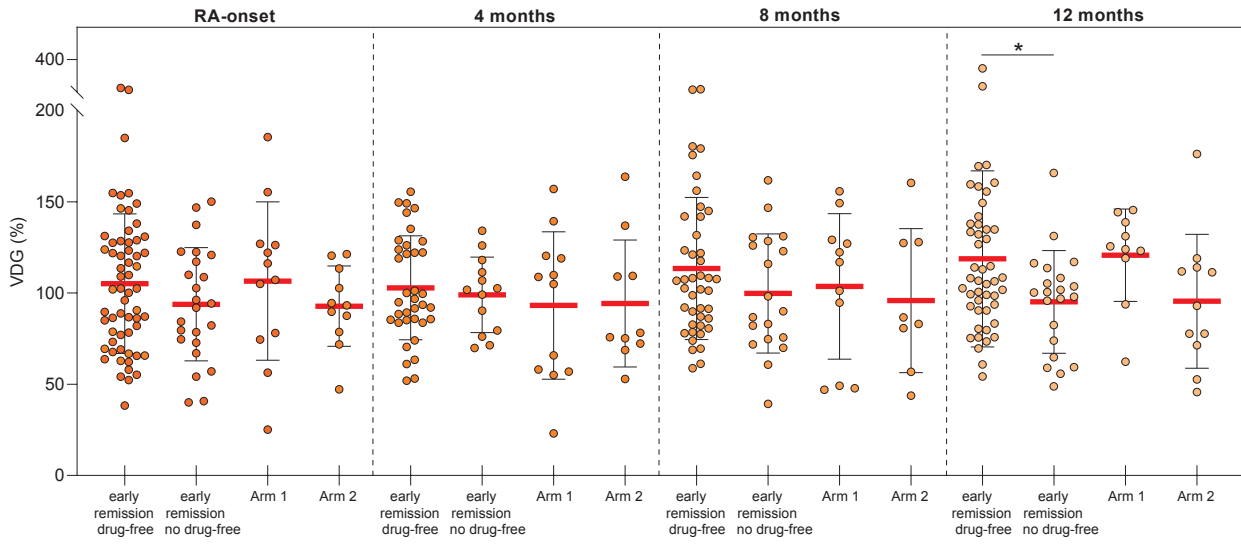**B**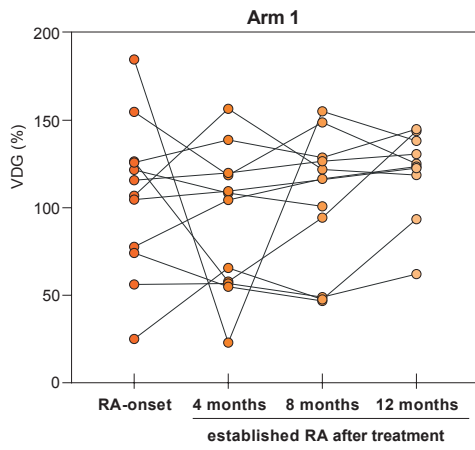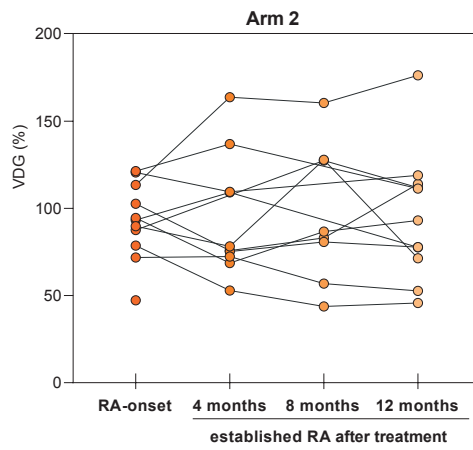

Supplement: ART-74-1147-s006.pdf [file ART-74-1147-s006.pdf]
